# Supplementary material
Source: MDPI journal article supplement (https://www.mdpi.com/2073-4395/12/3/641)
Supplement: s1 [file s1]

### Supplemental Table S1

Soil organic C and N over time in a 17-year agroforestry site in Fayetteville, AR, per tree species, and averaged across fertility treatments.

| Year | Tree Species | Soil Properties† |        |
|------|--------------|------------------|--------|
|      |              | SOC              | N      |
| %    |              |                  |        |
| 2001 | Oak          | 1.48 a‡          | 0.14 a |
|      | Pecan        | 1.46 a           | 0.14 a |
| 2008 | Oak          | 1.48 a           | 0.14 a |
|      | Pecan        | 1.54 a           | 0.15 a |
| 2016 | Oak          | 1.45 a           | 0.15 a |
|      | Pecan        | 1.58 a           | 0.16 a |

† SOC, soil organic C.

‡ Means followed by the same letter do not differ at  $p < 0.05$ .
